# Supplementary material for: Long-term flexibility-based structural evolution and condensation in microporous organosilica membranes for gas separation
Source: Royal Society of Chemistry journal article supplement (doi:10.1039/c6ta09559c), 2016-12-09
Supplement: c6ta09559c1.pdf [file c6ta09559c1.pdf]

## Supporting Information

### Long-Term Flexibility-Based Structural Evolution and Condensation in Microporous Organosilica Membranes for Gas Separation

*A. Petra Dral, Kristianne Tempelman, Emiel J. Kappert, Louis Winnubst, Nieck E. Benes, Johan E. ten Elshof\**

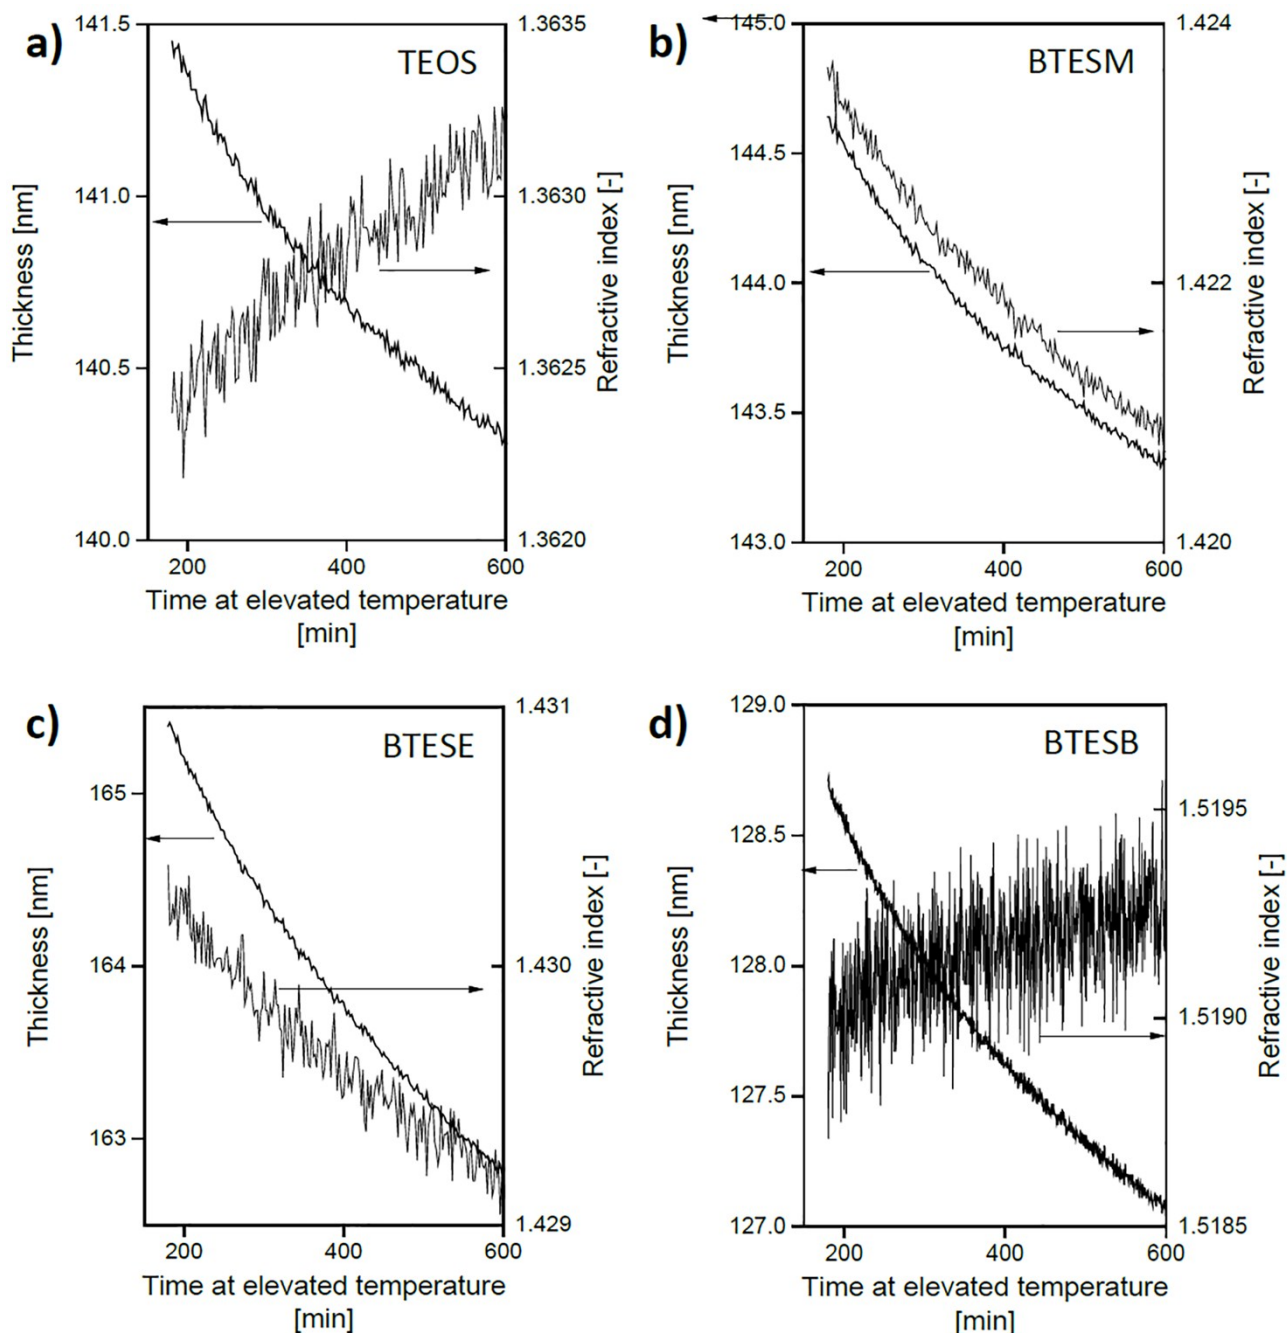

**Figure S1.** In situ SE thickness and refractive index data of a) TEOS-derived, b) BTESM-derived, c) BTESE-derived and d) BTESB-derived films at 300 °C in N<sub>2</sub> atmosphere.

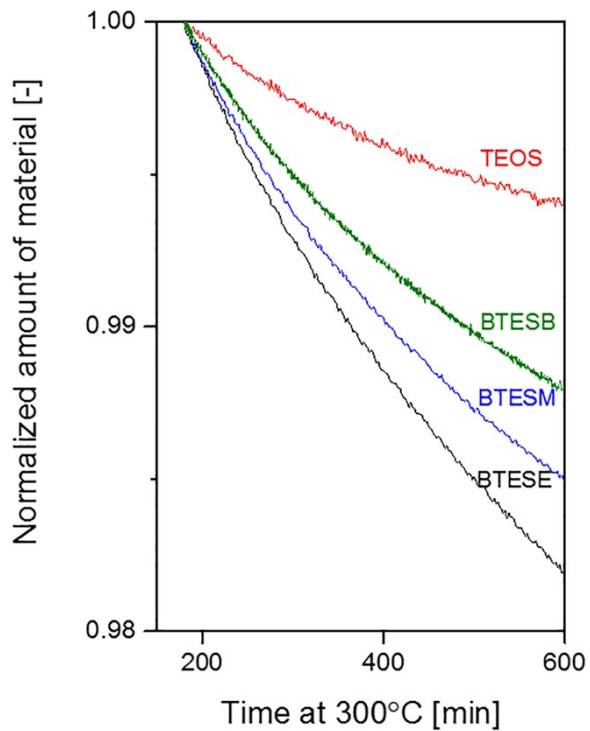

**Figure S2.** Normalized amount of material in TEOS-, BTESM-, BTESE- and BTESB-derived films at 300 °C in N<sub>2</sub> atmosphere, calculated from in situ SE thickness and refractive index data.

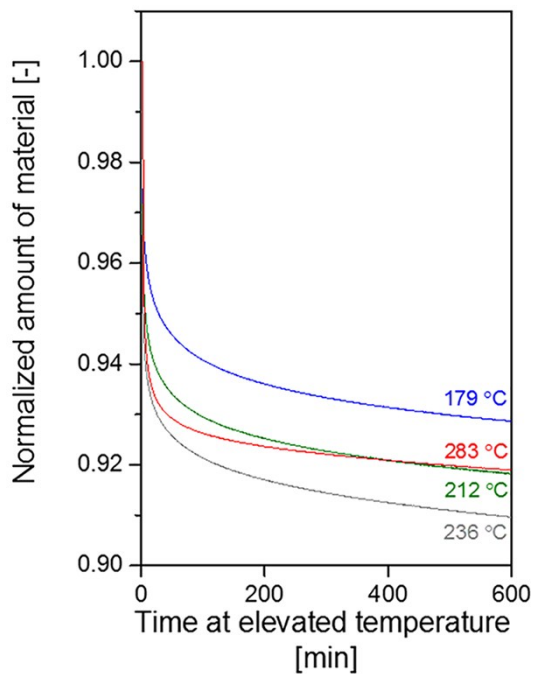

**Figure S3.** Normalized amount of material in BTESE-derived films at various temperatures in N<sub>2</sub> atmosphere, calculated from in situ SE thickness and refractive index data.
